# Supplementary material
Source: PubMed Central journal article supplement (PMC2679457)

## Supplementary Figure Legends

**Figure S1:** The C13=C14 dihedral torsion angle ( $-\circ-\circ-$ ) and the Schiff-base orientation angle  $\zeta$  ( $-\nabla-\nabla-$ ) (as defined in Fig.3) are plotted with respect to  $\lambda$  along the *trans*→ $\ddagger$ Ser115→13-*cis*→ $\ddagger$ Asp238→*trans* minimum energy path (MEP) obtained by Conjugate Peak Refinement (CPR, see methods).  $\lambda$ , which is the normalized sum of successive structures taken along the MEP, measures the overall progress of the transition.

**Figure S2:** Mulliken charge on the retinal Schiff-base group along the *trans*→ $\ddagger$ Ser115→13-*cis*→ $\ddagger$ Asp238→*trans* MEP, measured in absence (—) or presence (○) of the protein charges. Same as Fig.5C, but plotted with respect to the retinal C13=C14 dihedral torsion angle (taken from Fig.S1).

# Figure S1

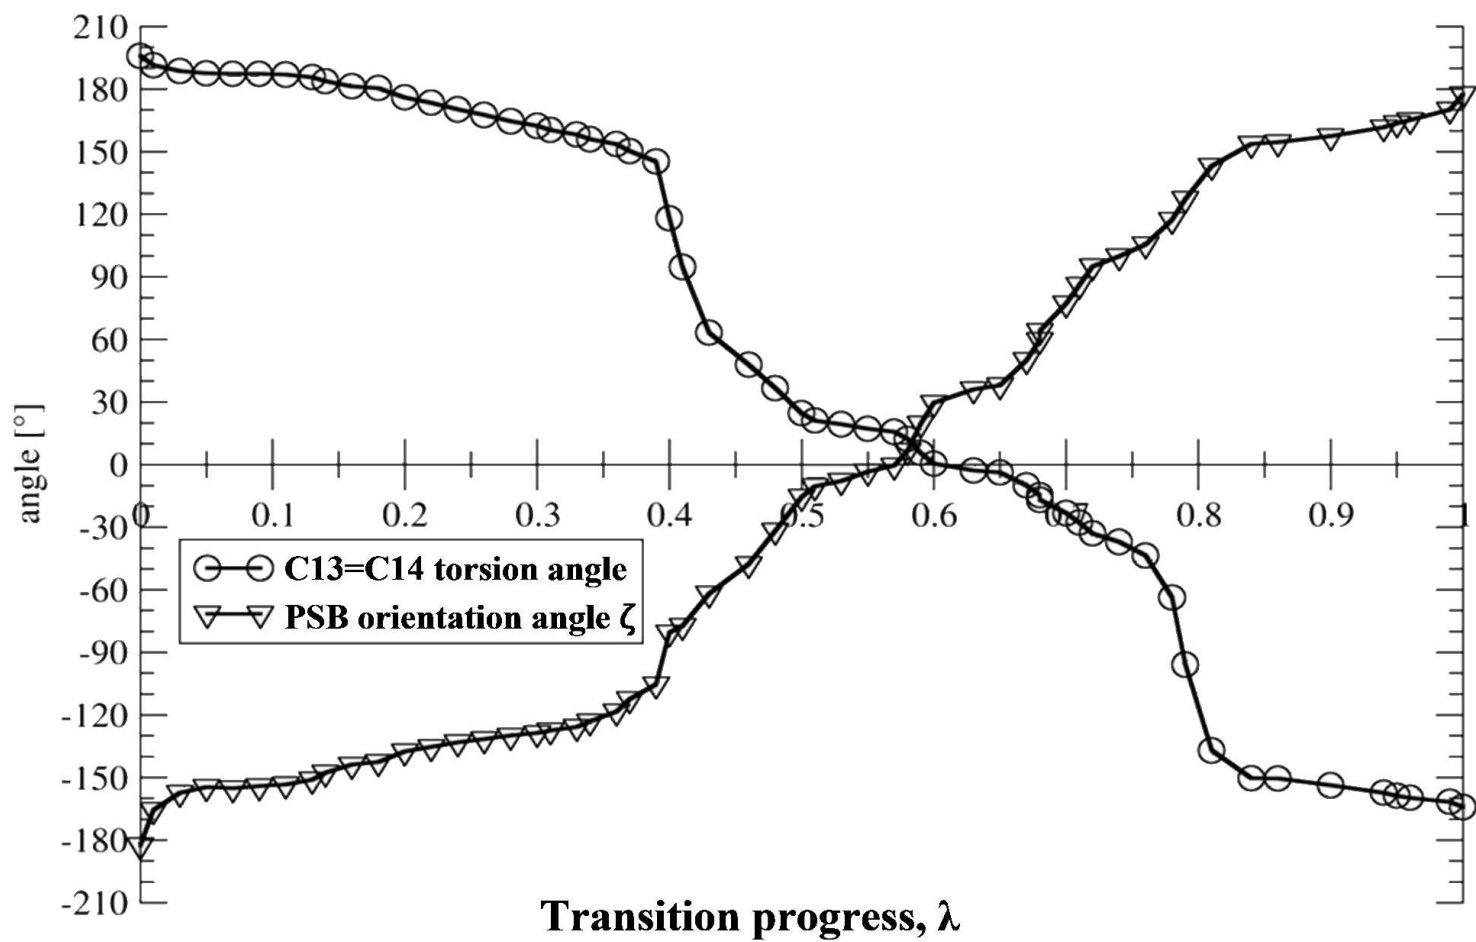

# Figure S2

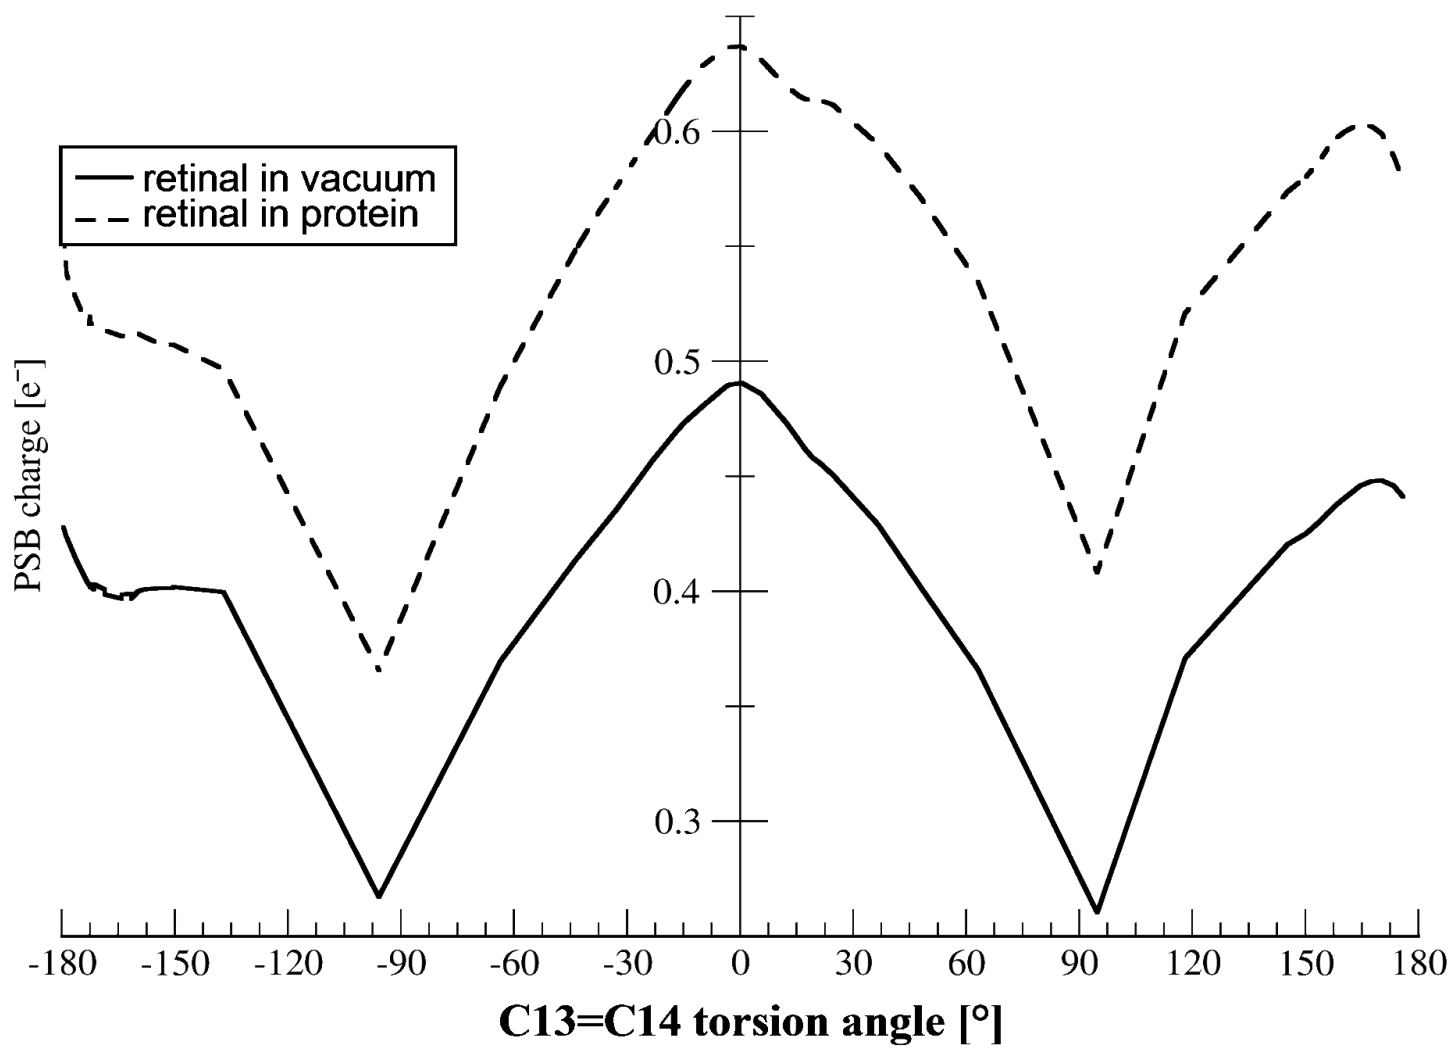

Supplement: M808787200_1.pdf [file M808787200_1.pdf]
